# Supplementary material
Source: PubMed Central journal article supplement (PMC3545354)
Supplement: Supp_Data.pdf [file Supp_Data.pdf]

## Supplementary Data

### Methods for Figure 3

A list of known xCT genes was established from entries in both the NCBI ([www.ncbi.nlm.nih.gov](http://www.ncbi.nlm.nih.gov)) and Ensembl ([www.ensembl.org/index.html](http://www.ensembl.org/index.html)) databases. These genes were then used as queries for a BLAST search in the NCBI database (<http://blast.ncbi.nlm.nih.gov/Blast.cgi>). Searches with the TBLASTN algorithm were performed in the nucleotide collection (nr/nt) database restricted to selected species to complete the overview and/or verify the absence of a known xCT ortholog. Multiple sequence alignments were created using MAFFT version 6 (<http://mafft.cbrc.jp/alignment/server>) using the E-INS-i setting (3). The phylogenetic analysis was done using the PhyML algorithm, which is based on maximum likelihood after trimming the multiple sequence alignment with JalView 2.5 ([www.jalview.org](http://www.jalview.org)) at a cut-off value of 85% gaps. This algorithm is available online ([www.hiv.lanl.gov/content/sequence/PHYML/interface.html](http://www.hiv.lanl.gov/content/sequence/PHYML/interface.html)), and the Blosum62 substitution matrix and 100 bootstrap trials were chosen as settings (2). The resulting phylogenetic tree was visualized with NJplot (<http://pbil.univ-lyon1.fr/software/njplot.html>).

### Methods for Figure 14

Cryosections of adult C57/Bl6 mouse eyes were fixed with ice-cold acetone; nonspecific binding was blocked using

Powerblock. Sections were incubated for 3 h at 37°C with a polyclonal antibody prepared against xCT (1). Negative control experiments were performed by blocking the anti-xCT antibody with 20 µg/ml of the antigenic peptide for 30 min before incubation with slides. After rinsing, all sections were incubated for 1 h at 37°C with Alexa Fluor 555-conjugated anti-rabbit IgG (Life Technologies, Grand Island, NY; 1:1000). Slides were coverslipped using Fluoroshield (Sigma Chem. Corp., St. Louis, MO). xCT was detected by epifluorescence using a Zeiss Axioplan-2 microscope equipped with the Axiovision program and an HRM camera. The anterior portion of the eye was examined to detect xCT in the cornea, ciliary body, and iris.

### Supplementary References

1. Dun Y, Mysona B, Van Ells T, Amarnath L, Ola MS, Ganapathy V, and Smith SB. Expression of the cystine-glutamate exchanger (xc<sup>-</sup>) in retinal ganglion cells and regulation by nitric oxide and oxidative stress. *Cell Tissue Res* 324: 189–202, 2006.
2. Guindon S and Gascuel O. A simple, fast, and accurate algorithm to estimate large phylogenies by maximum likelihood. *Syst Biol* 52: 696–704, 2003.
3. Katoh K, Kuma K, Toh H, and Miyata T. MAFFT version 5: improvement in accuracy of multiple sequence alignment. *Nucleic Acids Res* 33: 511–518, 2005.
